# Supplementary material for: An ambipolar PEDOT-perfluorinated porphyrin electropolymer: application as an active material in energy storage systems
Source: Royal Society of Chemistry journal article supplement (doi:10.1039/d4ra00945b), 2024-01-01
Supplement: d4ra00945b1.pdf [file d4ra00945b1.pdf]

# Ambipolar PEDOT-perfluorinated porphyrin electropolymer. Application as active material in energy storage systems

Elizabeth Bermúdez Prieto<sup>1,†</sup>, Edwin J. González López<sup>2,†</sup>, Claudia A Solis<sup>1,†</sup>, Jhair C. Leon Jaramillo<sup>1</sup>, Lorena P. Macor<sup>1</sup>, Rodrigo E. Domínguez<sup>3</sup>, Yohana B. Palacios<sup>2</sup>, Silvestre Bongiovanni Abel<sup>4</sup>, Edgardo N. Durantini<sup>2</sup>, Luis A. Otero,<sup>1</sup> Miguel A. Gervaldo<sup>1\*</sup> and Daniel A. Heredia<sup>2\*</sup>.

[1] IITEMA-CONICET, Departamento de Química, Facultad de Ciencias Exactas, Físico-Químicas y Naturales, Universidad Nacional de Río Cuarto, Agencia Postal Nro. 3, X5804BYA Río Cuarto, Córdoba, Argentina.

[2] IDAS-CONICET, Departamento de Química, Facultad de Ciencias Exactas, Físico-Químicas y Naturales, Universidad Nacional de Río Cuarto, Agencia Postal Nro. 3, X5804BYA Río Cuarto, Córdoba, Argentina.

[3] INFIQC-CONICET, Departamento de Química Orgánica, Facultad de Ciencias Químicas, Universidad Nacional de Córdoba, Córdoba X5000HUA, Argentina.

[4] INTEMA-CONICET, Facultad de Ingeniería, Universidad Nacional de Mar del Plata, B7606WV Mar del Plata, Buenos Aires, Argentina.

## Table of Contents

| Description                                                                   | Page N° |
|-------------------------------------------------------------------------------|---------|
| <b>Experimental Procedures. Materials and Instrumentation</b>                 | S-3     |
| <b>Figure S1.</b> Spectroelectrochemical cell                                 | S-4     |
| <b>Figure S2.</b> <sup>1</sup> H NMR spectrum of compound TPPF <sub>20</sub>  | S-5     |
| <b>Figure S3.</b> <sup>19</sup> F NMR spectrum of compound TPPF <sub>20</sub> | S-6     |

\* Corresponding authors. Tel.: +54 358 4676538; fax: +54 358 76233.

*E-mail address:* mgervaldo@exa.unrc.edu.ar (M.A. Gervaldo).

*E-mail address:* dheredia@exa.unrc.edu.ar (D.A. Heredia).

|                                                                                                                                  |      |
|----------------------------------------------------------------------------------------------------------------------------------|------|
| <b>Figure S4.</b> $^1\text{H}$ NMR spectrum of compound <b>EDOT-TPPF<sub>16</sub></b>                                            | S-7  |
| <b>Figure S5.</b> COSY NMR spectrum of compound <b>EDOT-TPPF<sub>16</sub></b>                                                    | S-8  |
| <b>Figure S6.</b> $^{19}\text{F}$ NMR spectrum of compound <b>EDOT-TPPF<sub>16</sub></b>                                         | S-9  |
| <b>Figure S7.</b> MALDI-TOF of compound <b>EDOT-TPPF<sub>16</sub></b>                                                            | S-10 |
| <b>Figure S8.</b> FTIR spectrum of compound <b>EDOT-TPPF<sub>16</sub></b>                                                        | S-11 |
| <b>Figure S9.</b> Fluorescence emission spectra of <b>TPPF<sub>20</sub></b> and <b>EDOT-TPPF<sub>16</sub></b>                    | S-12 |
| <b>Figure S10.</b> XRD corresponding to PEDOT-TPPF <sub>16</sub> sample.                                                         | S-13 |
| <b>Figure S11.</b> Comparative FT-IR spectra (ATR mode) for <b>EDOT-TPPF<sub>16</sub></b> , and <b>PEDOT-TPPF<sub>16</sub></b> . | S-14 |
| <b>Schem S1.</b> PEDOT polymerization mechanism                                                                                  | S-15 |
| <b>References</b>                                                                                                                | S-16 |

## Experimental Procedures. Materials and Instrumentation

All chemicals were commercially acquired from Sigma-Aldrich and used without further purification. DMF was dried using previously established procedures.<sup>i</sup> DMF, DCE and ACN were stored with 3Å molecular sieves for at least 24 h before use. Molecular sieves were pre-dried at 300 °C for 24 h immediately before use.<sup>ii</sup> Reactions were run under an argon atmosphere with freshly anhydrous distilled solvents and employing oven-dried glassware. The reactions were monitored by TLC (silica gel 60 GF254). Flash column chromatographies were performed in silica gel 60 H (0,040-0,063 mM, 230-400 mesh ASTM, Merck) by gradient elution of mixture of hexane/DCM, under positive pressure of nitrogen. Nuclear magnetic resonance (NMR) spectra were performed on an FT-NMR Bruker Advance DPX400 at 400 MHz (Bruker BioSpin, Rheinstetten, Deutschland) spectrometer. Me<sub>4</sub>Si was used as the internal standard and CDCl<sub>3</sub> as solvent. <sup>1</sup>H spectra were acquired at 400. Resonances of CHCl<sub>3</sub> in CDCl<sub>3</sub>: δ 7.26 for <sup>1</sup>H. The magnitudes of the coupling constants (*J*) are given in Hertz. 2D-NMR (COSY) and <sup>19</sup>F experiment were also recorded. Mass spectrum of was obtained with a Voyager DE STR matrix-assisted laser desorption/ionization time-of-flight (MALDI-TOF) mass spectrometer in positive ion mode, and *trans,trans*-1,4-diphenyl-1,3-butadiene was used as matrix. Absorption spectra were carried out on a Shimadzu UV-2401PC spectrometer (Shimadzu Corporation, Tokyo, Japan). Absorption spectra and spectroelectrochemical measurements of PEDOT-TPPF<sub>16</sub> were carried out on a UV-Visible Spectrophotometer Hewlett Packard-Diode Matrix 8453. Fluorescence spectra were performed on FluoroMax-4 spectrofluorometer (Horiba Jobin Yvon Inc, Edison, NJ, USA). FTIR measurement was performed using a Bruker Vertex 70 spectrometer in absorption mode under a dry nitrogen purge with a 2 cm<sup>-1</sup> resolution, GloBar MIR source, broadband KBr beamsplitter, and liquid nitrogen cooled MCT detector.

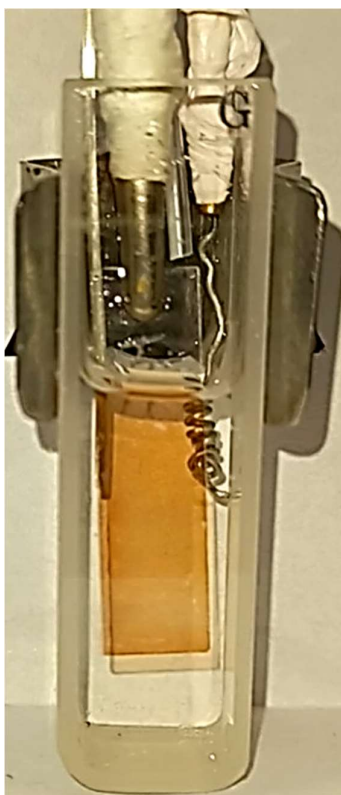

**Figure S1.** Spectroelectrochemical cell. Working electrode: PEDOT-TPPF<sub>16</sub> electrodeposited on ITO. Reference electrode: silver. Counter electrode: platinum.

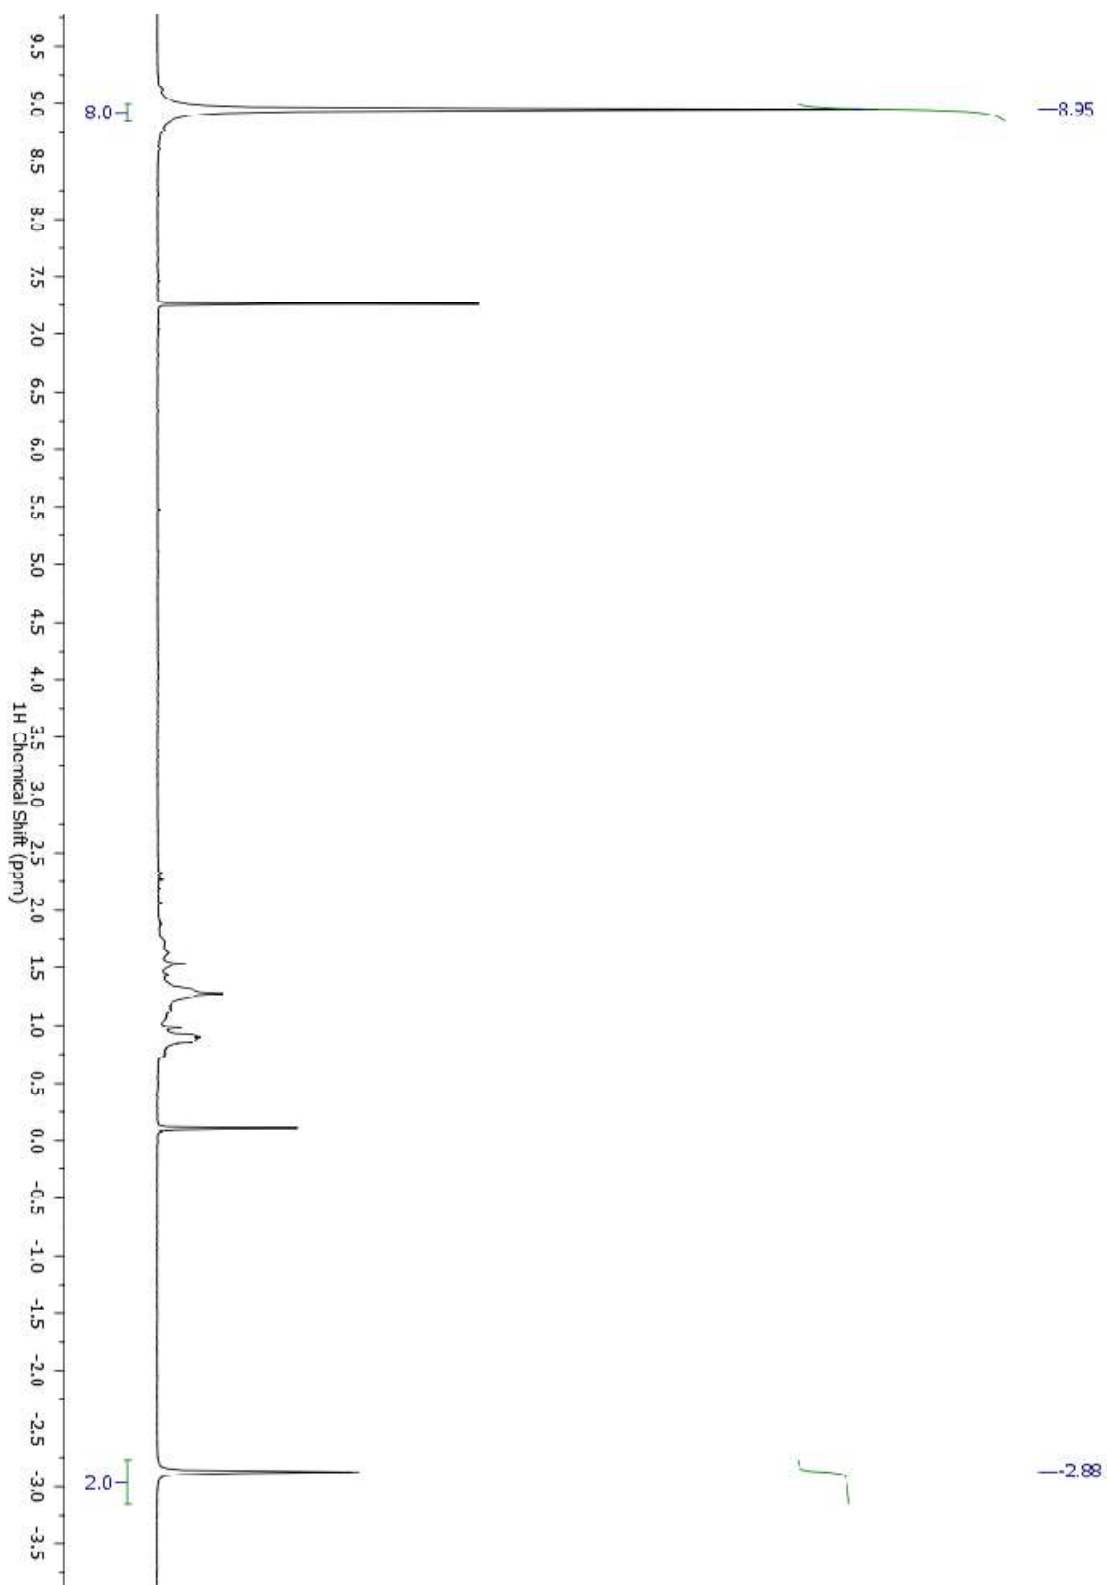

**Figure S2.**  $^1\text{H}$  NMR spectrum of compound **TPPF<sub>20</sub>** in  $\text{CDCl}_3$ .

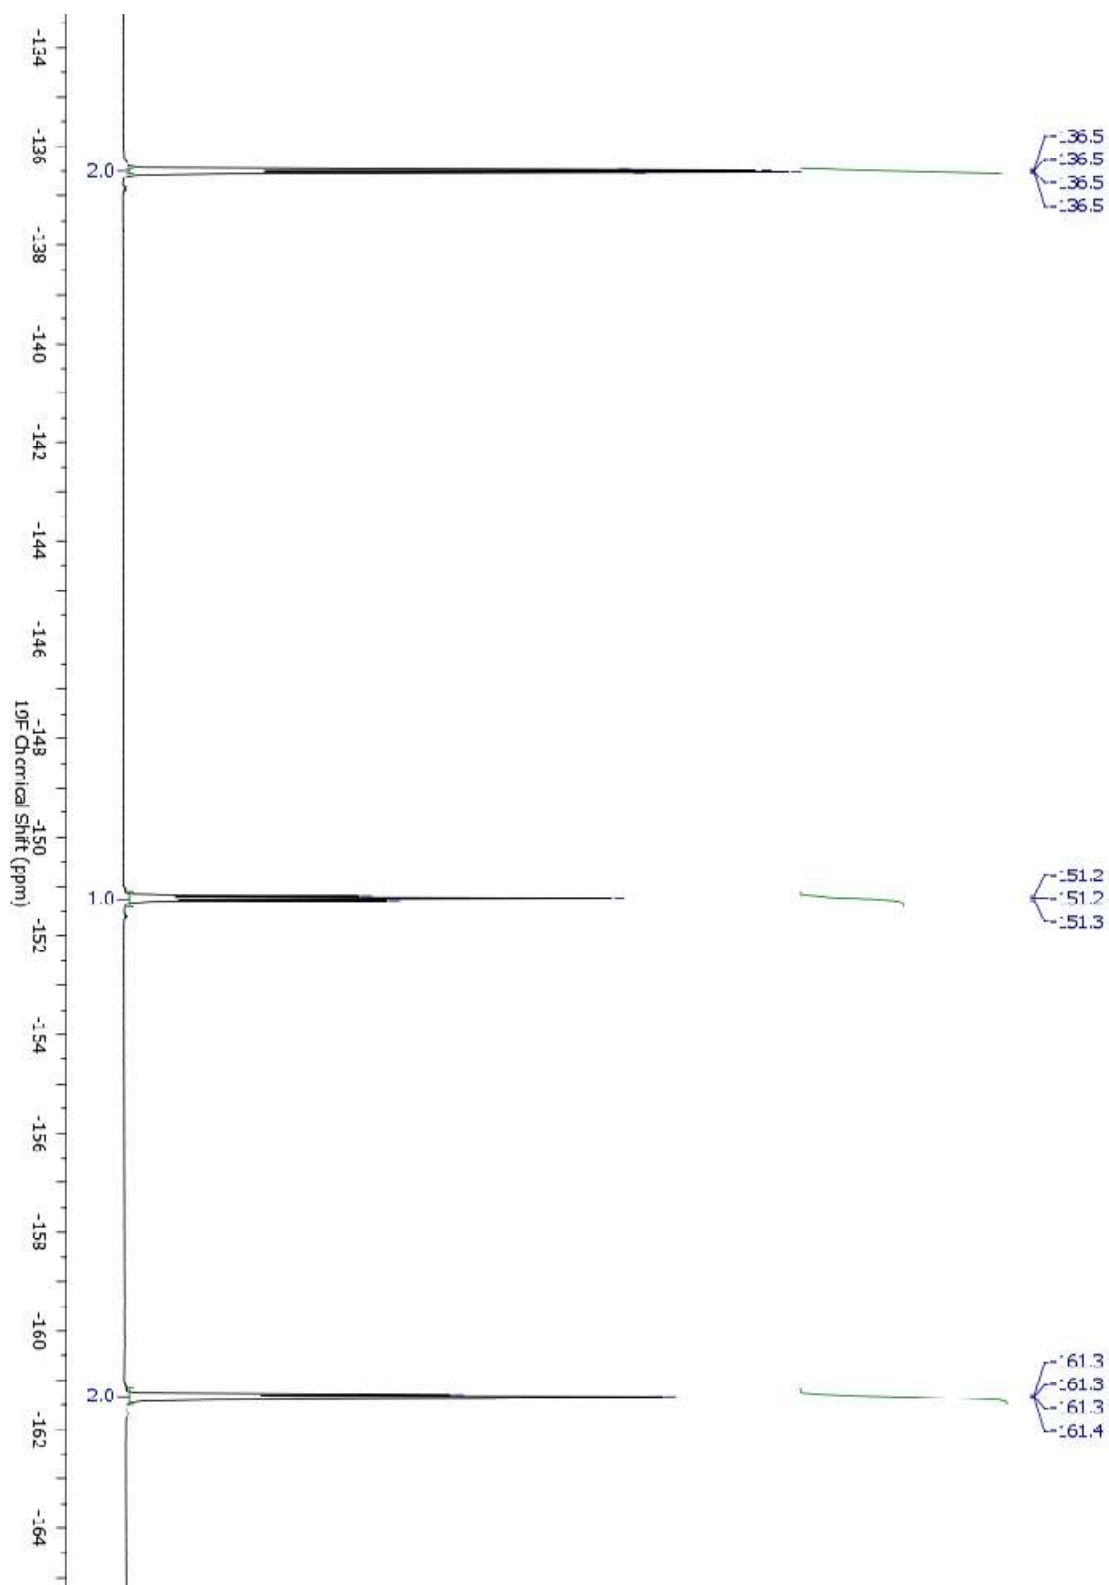

**Figure S3.**  $^{19}\text{F}$  NMR spectrum of compound TPPF<sub>20</sub> in CDCl<sub>3</sub>.

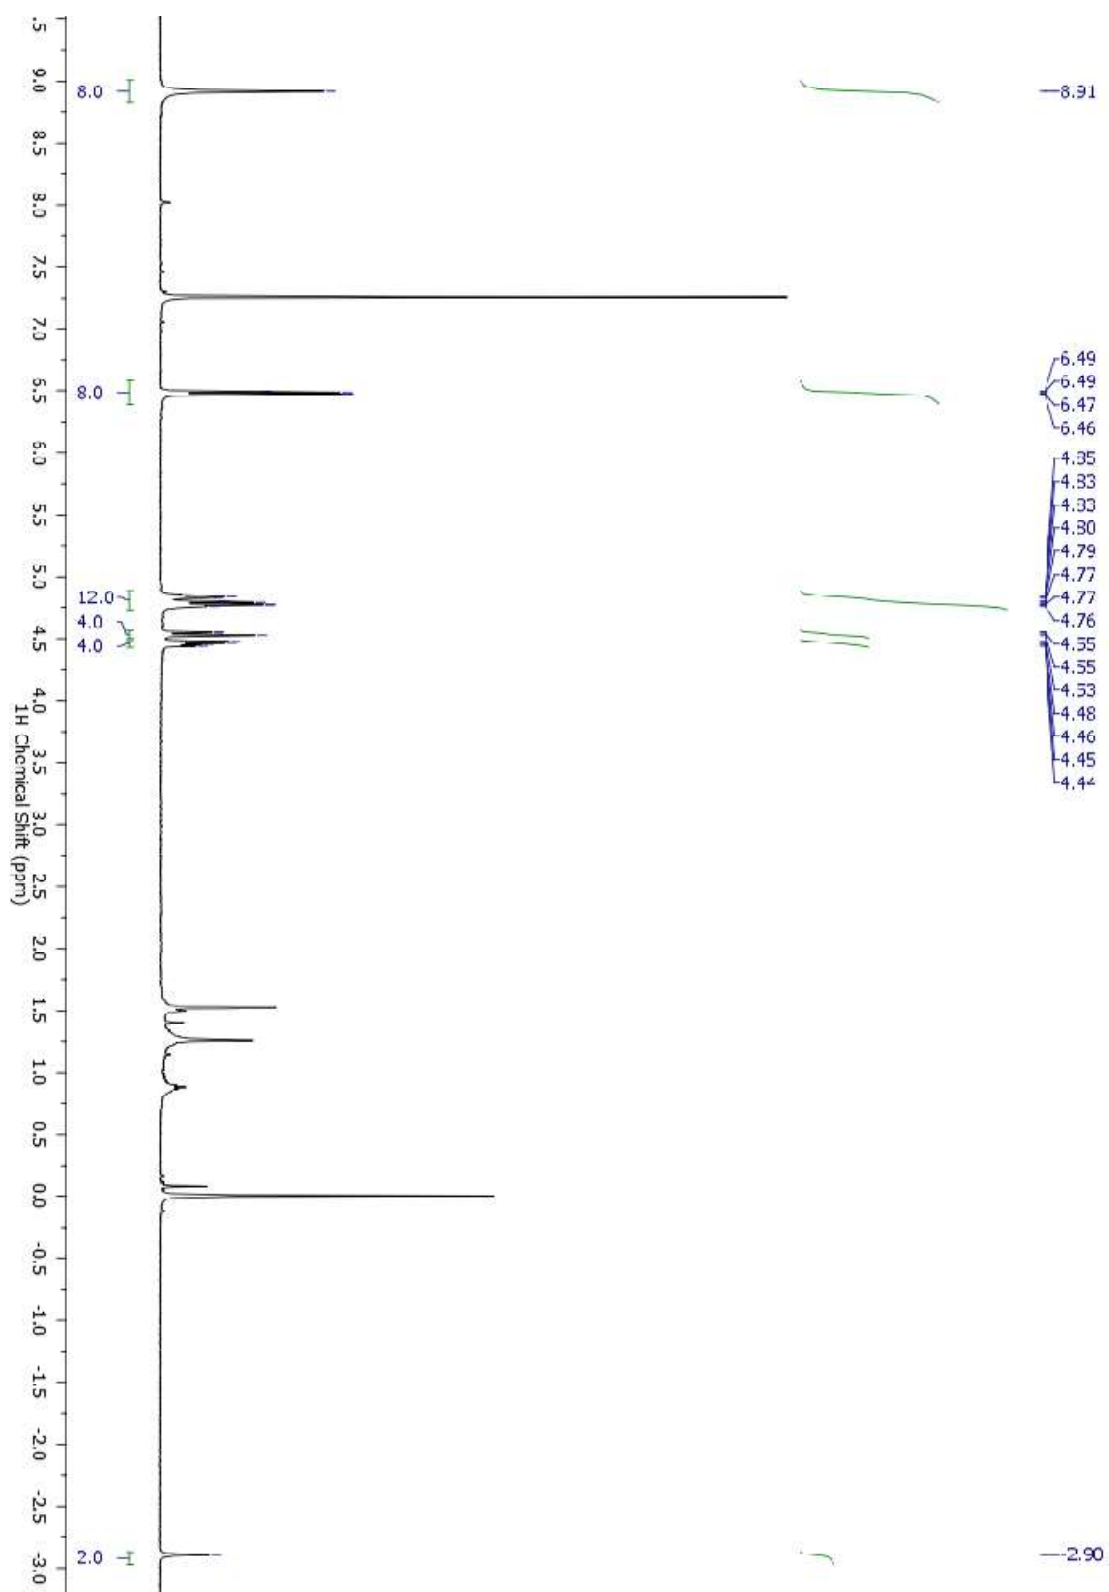

Figure S4.  $^1\text{H}$  NMR spectrum of compound EDOT-TPPF<sub>16</sub> in CDCl<sub>3</sub>.

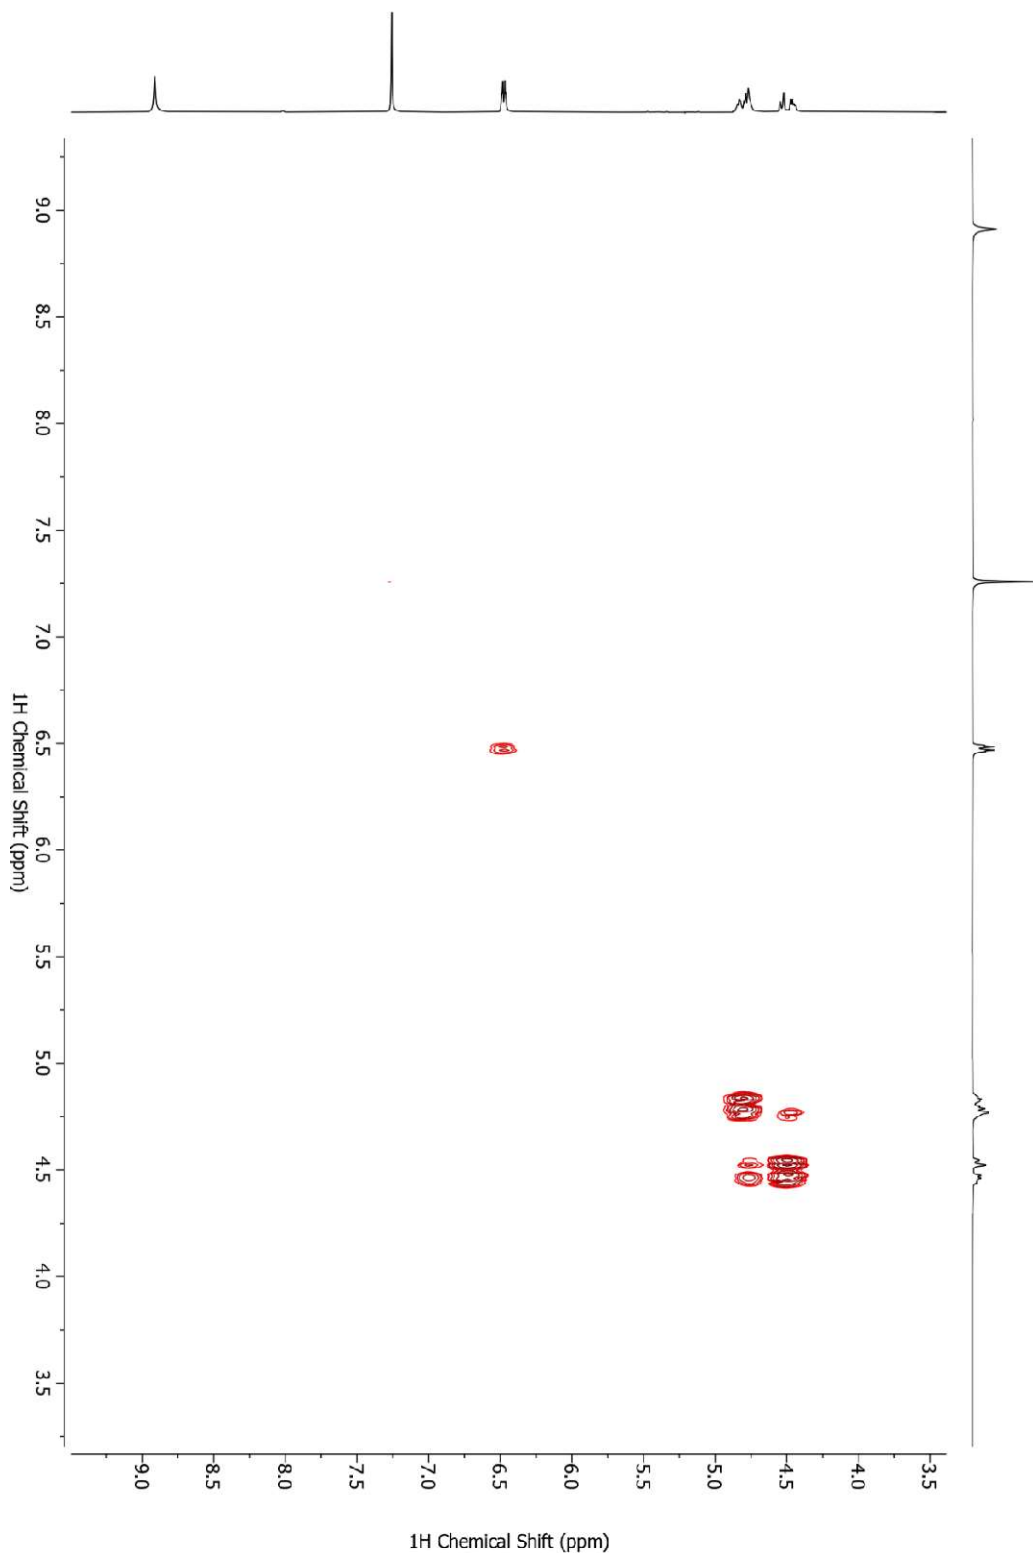

**Figure S5.** COSY NMR spectrum of compound **EDOT-TPPF<sub>16</sub>** in  $\text{CDCl}_3$ .



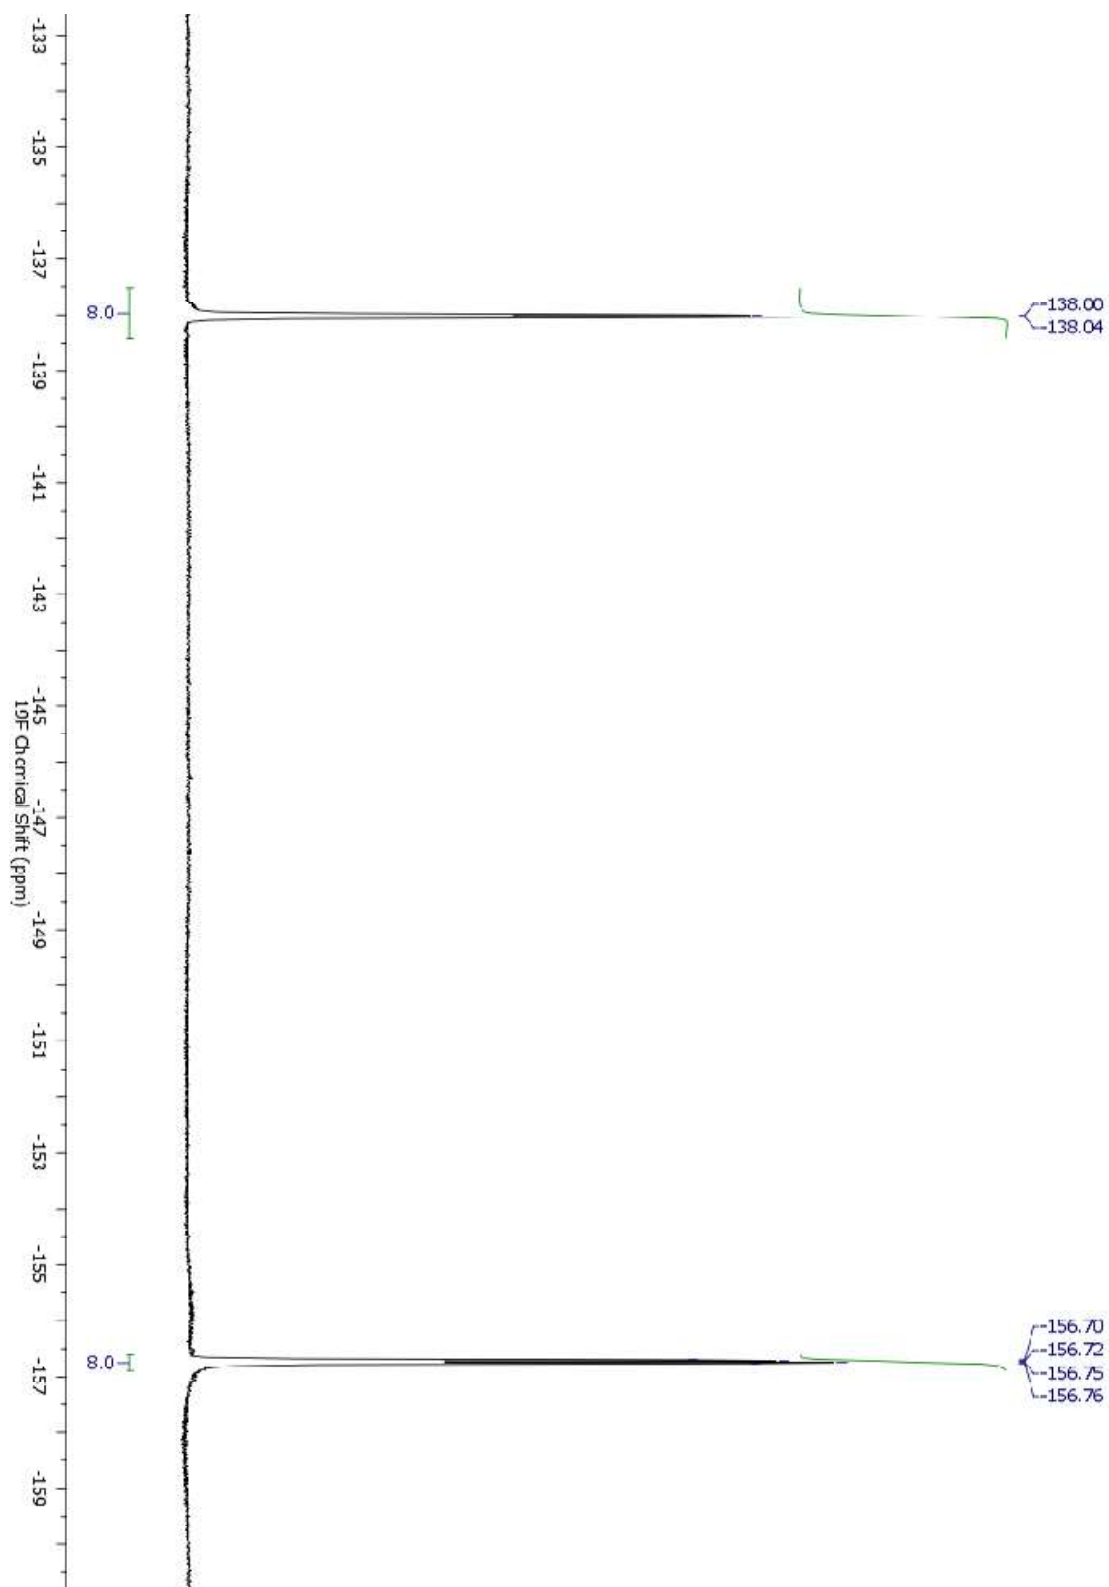

Figure S6.  $^{19}\text{F}$  NMR spectrum of compound EDOT-TPPF<sub>16</sub> in CDCl<sub>3</sub>.

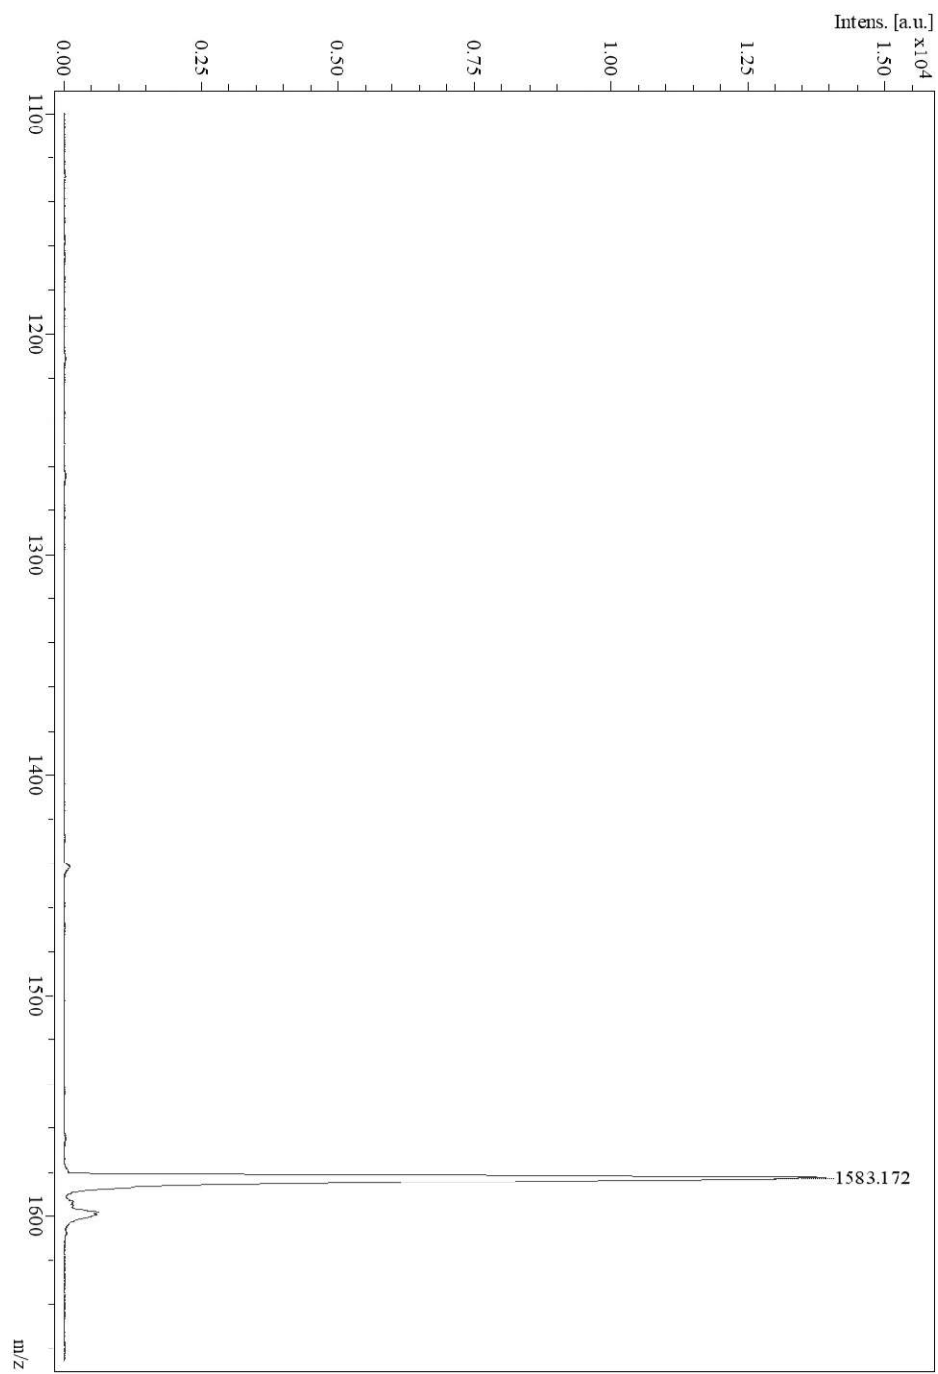

**Figure S7.** MALDI-TOF spectrum of compound **EDOT-TPPF<sub>16</sub>**.

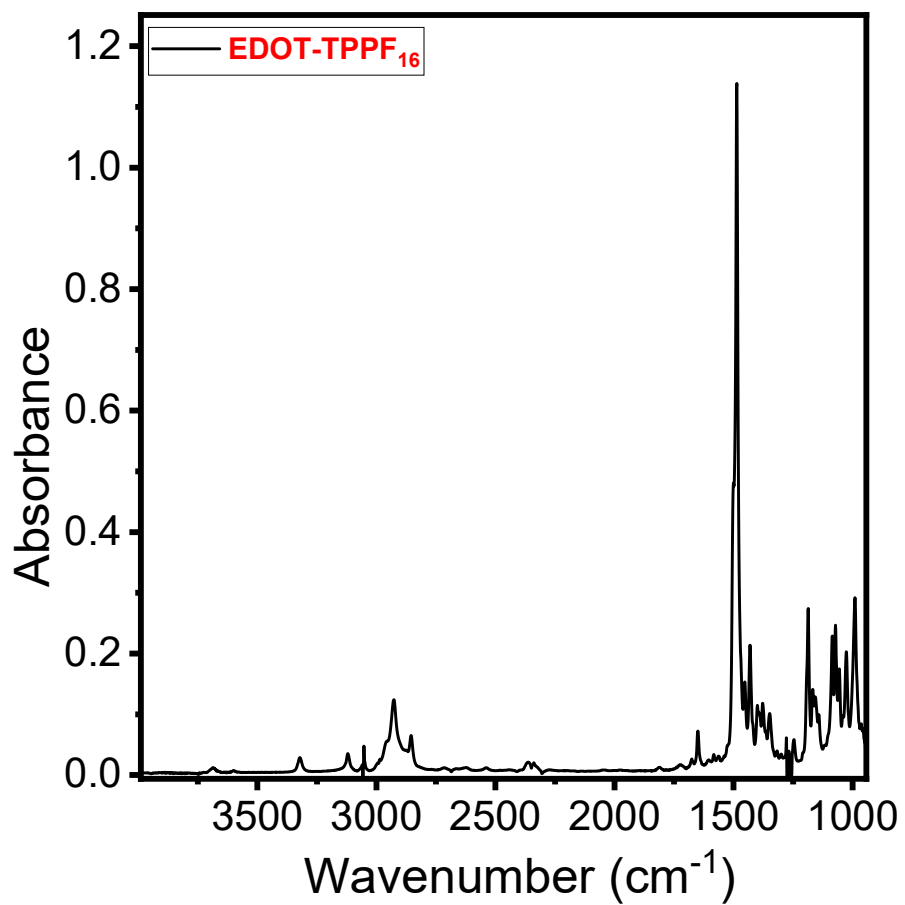

**Figure S8.** FTIR spectrum of compound **EDOT-TPPF<sub>16</sub>** in KBr disks.

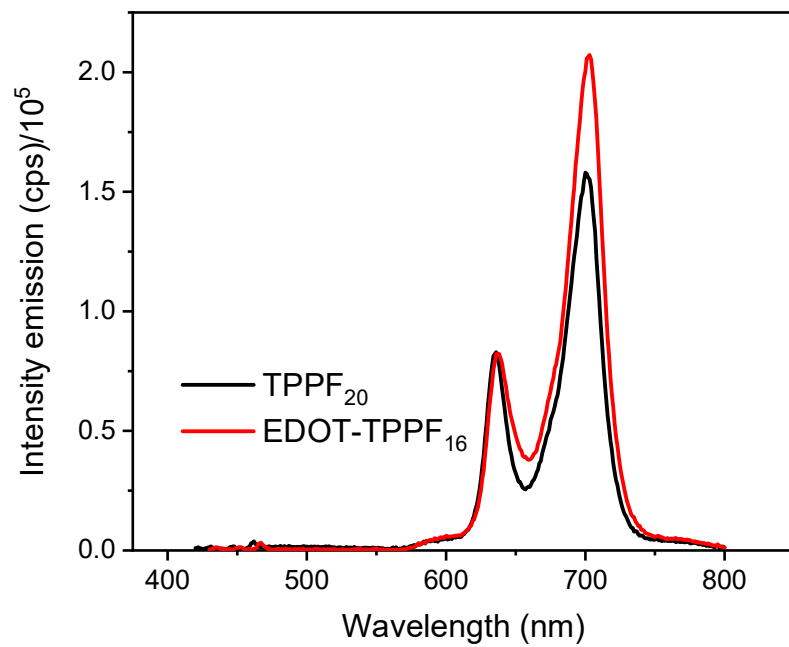

**Figure S9.** Fluorescence emission spectra recorded in diluted acetonitrile solution at room temperature.  $\lambda_{\text{exc}}$ : Soret band. (Abs = 0.1 at Soret band).

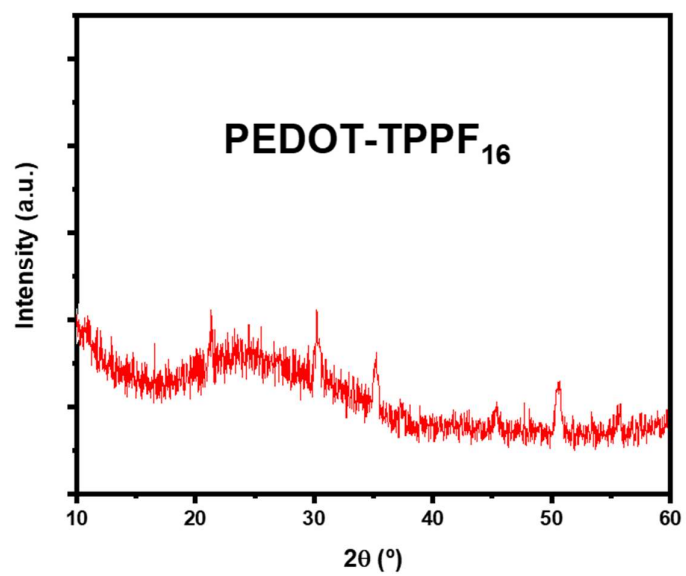

**Figure S10.** XRD corresponding to **PEDOT-TPPF<sub>16</sub>** electrodeposited on ITO.

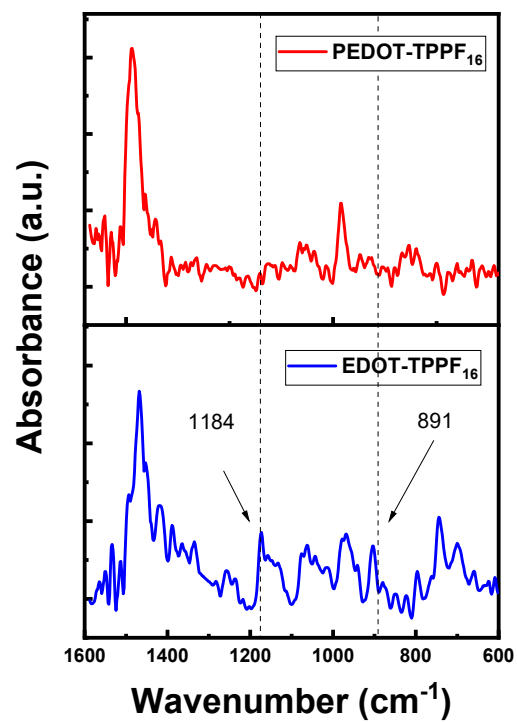

**Figure S11.** Comparative FT-IR spectra (ATR mode) for **EDOT-TPPF<sub>16</sub>**, and **PEDOT-TPPF<sub>16</sub>**.

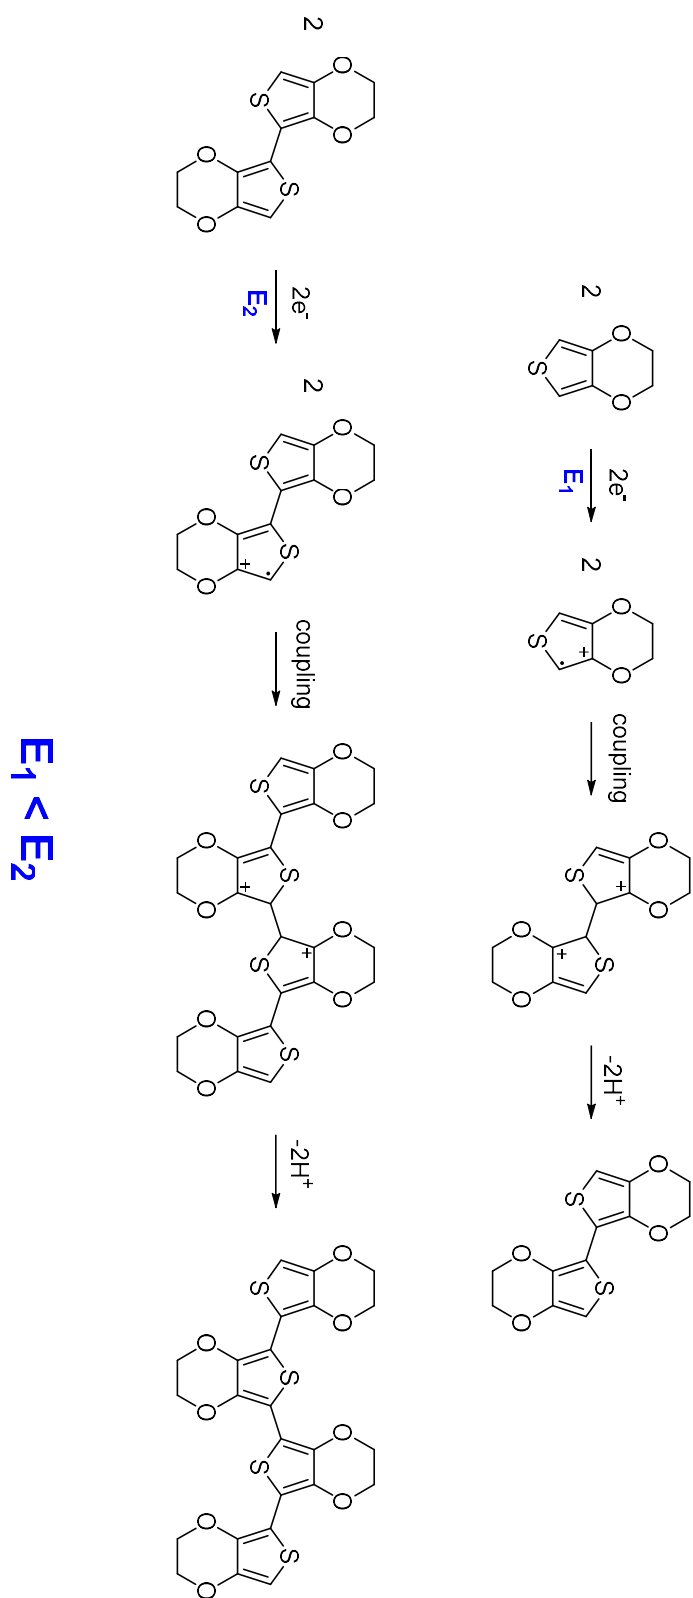

Scheme S1. PEDOT polymerization mechanism.

## References

---

- i- D.D. Perrin, W.L.F. Armarego, Purification of Laboratory Chemicals, 4<sup>th</sup> edition. Butterworth-Heinemann (1997). ISBN-10: 0750637617. ISBN-13: 978-0750637619.
- ii D. Bradley G. Williams, Michelle Lawton, Drying of Organic Solvents: Quantitative Evaluation of the Efficiency of Several Desiccants. J. Org. Chem. 75 (2010) 8351-8354.
